# Supplementary material
Source: publisher figshare collection journal article supplement (https://acs.figshare.com/ndownloader/files/27660212)
Supplement: Supplementary file 1 [file 27660212]

## **Supporting Information**

**Title:** Melatonin receptor agonist ramelteon suppresses LPS-induced  
neuroinflammation in astrocytes

**Authors:** Shu Yang<sup>1#</sup>, Jianhong Wang<sup>1#</sup>, Duozi Wang<sup>1</sup>, Lei Guo<sup>1</sup>, Dalin Yu<sup>2\*</sup>

### **Affiliations**

1, Department of Neurology, the Affiliated Hospital of University of Electronic Science and Technology, Sichuan Provincial People' s Hospital, Chengdu, Sichuan, 610072, China

2, Department of Neurology, Chengdu Tianfu New District People's Hospital, Chengdu, Sichuan, 610213, China

<sup>#</sup>These authors contributed equally to this work.

### **\*Corresponding author:**

\*, Dalin Yu

Department of Neurology, Chengdu Tianfu New District People's Hospital, No. 97, Zhengbei Street, Huayang Street, Tianfu New District, Chengdu, Sichuan, 610213, China.

**Tel/Fax:** +86-028-61613120

**Institute E-mail:** [hightech@uestc.edu.cn](mailto:hightech@uestc.edu.cn); Private Email: yudalin512@163.com

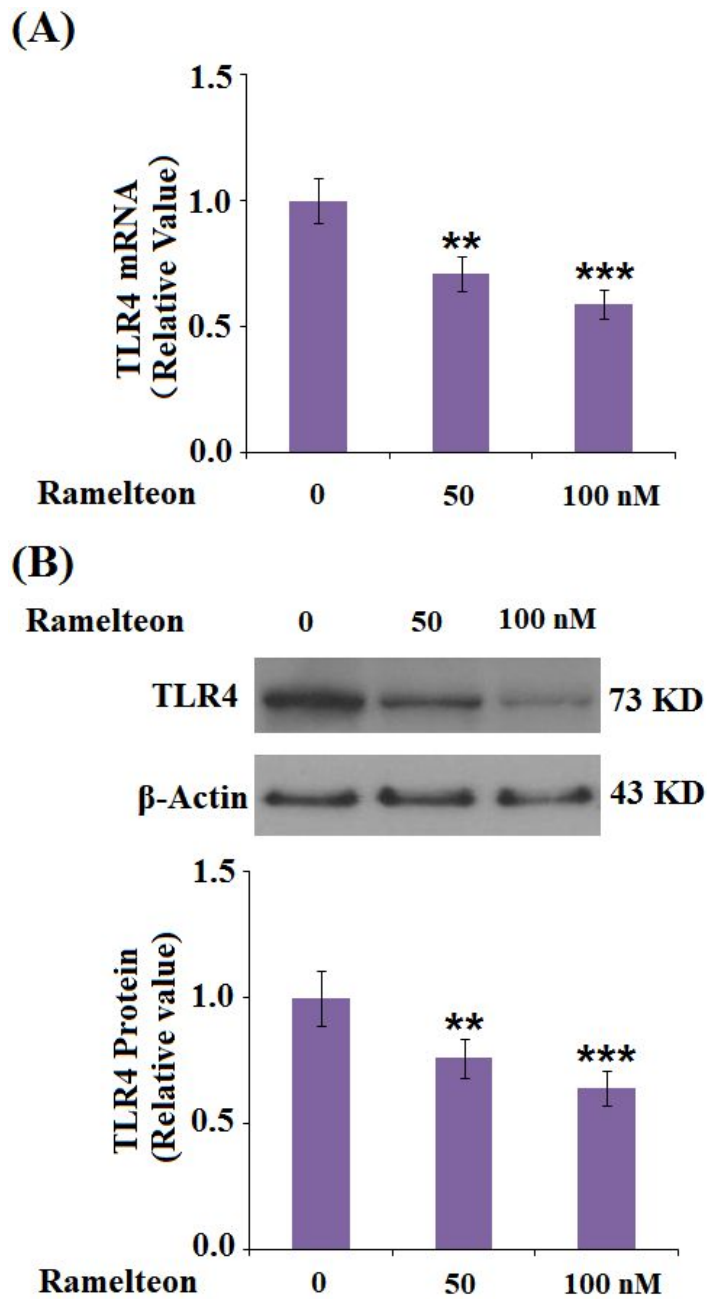

**Figure S1.** The effects of Ramelteon alone on the expression of TLR4 in astrocytes. Cells were treated with Ramelteon (50, and 100 nM) for 24 hours. (A). mRNA of TLR4 ; (B). Protein of TLR4 (\*\*, \*\*\*,  $P < 0.01$ ,  $0.005$  vs. vehicle group,  $N=5$ ).
